# Supplementary material
Source: PubMed Central journal article supplement (PMC8045482)
Supplement: NIHMS1686116-supplement-Supplement.pdf [file NIHMS1686116-supplement-Supplement.pdf]

## Appendix

- I. Auxiliary Data Sources
- II. Calculation of Community Case Fatality Rates
- III. Appendix Exhibit A1. Distribution of Analytic Sample by State
- IV. Appendix Exhibit A2. Characteristics of Nursing Homes in the Analytic Sample versus Other U.S. Nursing Homes
- V. Appendix Exhibit A3. Lowess Estimated Trends in Crude 30-Day COVID-19-related Mortality
- VI. Appendix Exhibit A4. Semimonthly Trends in Crude 30-Day COVID-19-related Mortality among Residents with and without Functional Impairment
- VII. Appendix Exhibit A5. Multivariable Association between COVID-19 Diagnosis Date and 30-day Mortality
- VIII. Appendix Exhibit A6. Multivariable Association between COVID-19 Diagnosis Date and 30-day Mortality Estimated with Fixed Effects Linear Probability Model
- IX. Appendix Exhibit A7. Correspondence between Crude Community and Nursing Home Level COVID-19 Case Fatality Rates
- X. Appendix Exhibit A8. Adjusted Trends in 30-Day Hospitalization Rates among Residents with COVID-19

## **I. Auxiliary Data Sources**

We obtained nursing facility level characteristics from four sources. First, the Certification and Survey Provider Enhanced Reporting (CASPER) database includes information on nursing home organizational characteristics (e.g., bed size, payer mix) collected from annual surveys as well as location (state and county). Second, we used rural-urban continuum codes available from the U.S. Department of Agriculture (<https://www.ers.usda.gov/data-products/rural-urban-continuum-codes.aspx>) to classify nursing homes as rural or urban based on the county they are located in. Third, data on resident characteristics were obtained from the Long-Term Care: Facts on Care in the U.S. (LTCfocus) website ([www.ltcfocus.org](http://www.ltcfocus.org)). LTCfocus is maintained by Brown University and includes hundreds of facility-level measures based on Minimum Data Set resident assessments. Fourth, the Nursing Home Compare website ([www.medicare.gov/nursinghomecompare](http://www.medicare.gov/nursinghomecompare)) contains many nursing home quality measures (e.g. hospital admission rates) that are also aggregated and summarized as star-ratings (scored from 1 to 5 stars [higher is better]).

## **II. Calculation of Community Case Fatality Rates**

We compared the trend in case fatality rates for the analytic sample to the trend for surrounding communities. To calculate the community-level case fatality rate, we first identified the counties that the nursing homes in our sample are located in. We then defined the county-level case fatality rate for any given semimonthly period as the number of deaths during next period divided by the number of incident cases during the current period. We did not use deaths and cases from the same time interval due to the gap between diagnosis and death. We also subtracted nursing home deaths in our analytic sample from this calculation. Finally, we computed the median case fatality rate of the selected counties for each semimonthly period. We applied the proportion of nursing home residents residing in each county at each time point as sampling weights.

### III. Appendix Exhibit A1. Distribution of Analytic Sample by State

| State | No. Residents | % Residents | No. Facilities | % Facilities |
|-------|---------------|-------------|----------------|--------------|
| PA    | 2111          | 17          | 29             | 10           |
| NJ    | 1915          | 16          | 29             | 10           |
| MA    | 1449          | 12          | 25             | 9            |
| CT    | 1247          | 10          | 18             | 6            |
| MD    | 1244          | 10          | 25             | 9            |
| NM    | 945           | 8           | 24             | 9            |
| CO    | 523           | 4           | 9              | 3            |
| WV    | 480           | 4           | 26             | 9            |
| NH    | 345           | 3           | 18             | 6            |
| KY    | 339           | 3           | 15             | 5            |
| RI    | 308           | 3           | 8              | 3            |
| NC    | 244           | 2           | 7              | 2            |
| AL    | 211           | 2           | 7              | 2            |
| DE    | 202           | 2           | 6              | 2            |
| FL    | 197           | 2           | 5              | 2            |
| AZ    | 188           | 2           | 4              | 1            |
| ME    | 164           | 1           | 9              | 3            |
| VT    | 51            | 0           | 5              | 2            |
| CA    | 48            | 0           | 4              | 1            |
| IN    | 25            | 0           | 1              | 0            |
| VA    | 25            | 0           | 2              | 1            |
| TN    | 5             | 0           | 2              | 1            |
| ID    | 3             | 0           | 2              | 1            |
| WA    | 2             | 0           | 2              | 1            |

Notes: No. = number of.

**IV. Appendix Exhibit A2. Characteristics of Nursing Homes in the Analytic Sample versus Other U.S. Nursing Homes**

| Characteristic, Median (IQR) or %  | Sample Nursing Homes (n=282) | Other Nursing Homes (n=15161) |
|------------------------------------|------------------------------|-------------------------------|
| Total no. beds                     | 120 (94 to 142)              | 99 (64 to 126)                |
| Total no. beds                     |                              |                               |
| Small (0-60)                       | 4                            | 24                            |
| Average (61-99)                    | 25                           | 27                            |
| Large (100 or more)                | 71                           | 49                            |
| For-profit                         | 100                          | 70                            |
| Chain member                       | 100                          | 58                            |
| <u>Resident characteristics</u>    |                              |                               |
| % Black                            | 5 (1 to 16)                  | 5 (0 to 17)                   |
| % Hispanic                         | 2 (0 to 5)                   | 0 (0 to 4)                    |
| % Dementia                         | 43 (35 to 53)                | 45 (33 to 57)                 |
| <u>Payer mix</u>                   |                              |                               |
| % Medicare                         | 10 (7 to 17)                 | 10 (5 to 17)                  |
| % Medicaid                         | 73 (61 to 82)                | 64 (47 to 76)                 |
| % Private pay                      | 15 (10 to 23)                | 23 (13 to 37)                 |
| <u>Quality</u>                     |                              |                               |
| Overall rating (/5)                | 3 (2 to 4)                   | 3 (2 to 4)                    |
| Staffing rating (/5)               | 3 (2 to 4)                   | 3 (2 to 4)                    |
| Infection control citation         | 45                           | 42                            |
| <u>Area-level characteristics</u>  |                              |                               |
| Rural                              | 15                           | 29                            |
| Bureau of Economic Analysis Region |                              |                               |
| Far west                           | 2                            | 11                            |
| Rocky mountain                     | 4                            | 3                             |
| Southwest                          | 10                           | 12                            |
| Plains                             | 0                            | 14                            |
| Southeast                          | 23                           | 23                            |
| Great Lakes                        | 0                            | 20                            |
| Mideast                            | 32                           | 12                            |
| New England                        | 30                           | 5                             |

Notes: Nursing homes were classified as rural or urban based on the rural-urban continuum code of their county. Quality ratings refer to 5-star ratings published on the Medicare Nursing Home Compare website. See Appendix Section I for details.

V. Appendix Exhibit A3 Lowess Estimated Trends in Crude 30-Day COVID-19-related Mortality

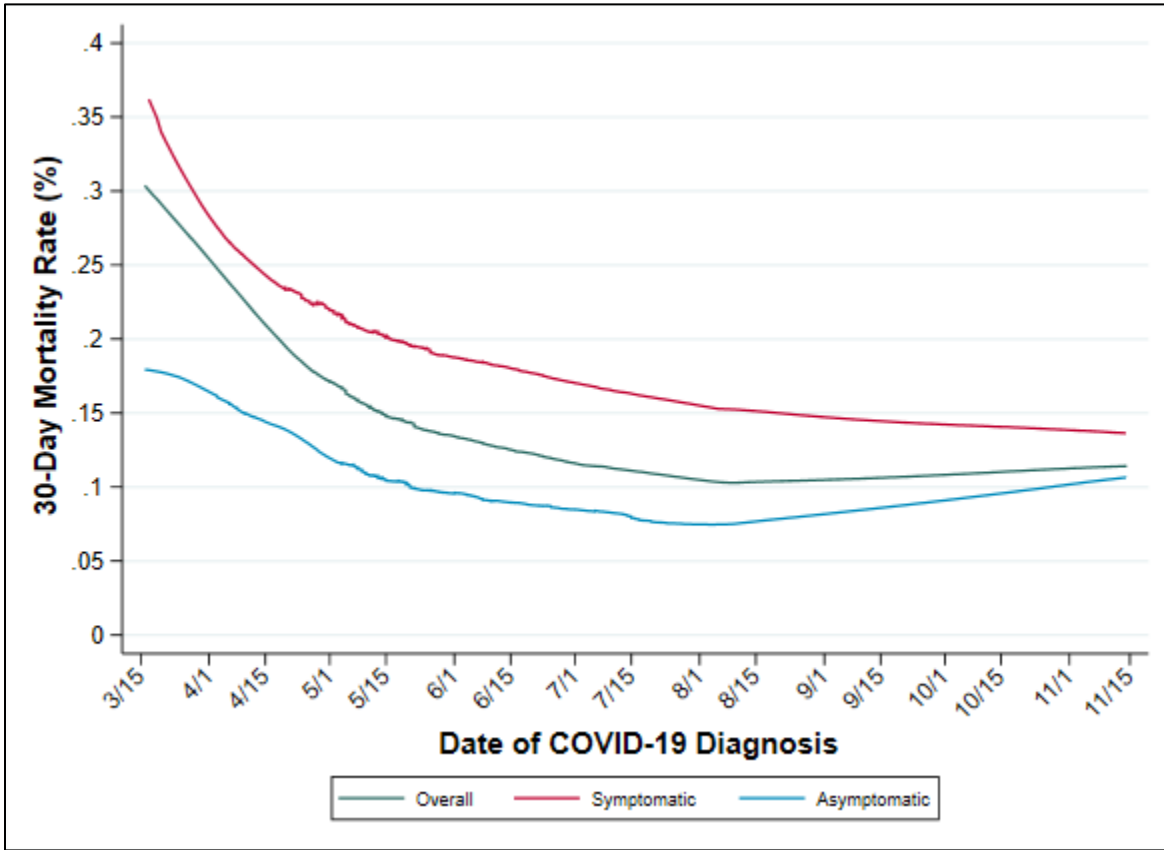

Notes: COVID-19 was identified via reverse transcriptase polymerase chain reaction testing for SARS-CoV-2. Trend lines were estimated with Lowess (locally weighted scatterplot smoothing) using all data points from the analytic sample.

**VI. Appendix Exhibit A4. Semimonthly Trends in 30-Day COVID-19-related Mortality among Residents with and without Functional Impairment**

| Date of Diagnosis | <u>CFS &lt; 3, ADL &lt; 19</u> |                    | <u>CFS &lt; 3, ADL &gt; 19</u> |                    | <u>CFS ≥ 3, ADL &lt; 19</u> |                    | <u>CFS ≥ 3, ADL &gt; 19</u> |                    |
|-------------------|--------------------------------|--------------------|--------------------------------|--------------------|-----------------------------|--------------------|-----------------------------|--------------------|
|                   | No. Patients                   | 30d Death Rate (%) | No. Patients                   | 30d Death Rate (%) | No. Patients                | 30d Death Rate (%) | No. Patients                | 30d Death Rate (%) |
| 3/16 to 3/31      | 103                            | 18.4               | 65                             | 16.9               | 36                          | 41.7               | 61                          | 41.0               |
| 4/1 to 4/15       | 674                            | 17.2               | 471                            | 18.9               | 211                         | 26.1               | 400                         | 35.2               |
| 4/16 to 4/30      | 961                            | 9.7                | 610                            | 15.1               | 373                         | 19.3               | 609                         | 32.2               |
| 5/1 to 5/15       | 821                            | 8.8                | 598                            | 13.0               | 350                         | 15.1               | 715                         | 24.5               |
| 5/16 to 5/31      | 260                            | 3.9                | 190                            | 11.1               | 101                         | 15.8               | 171                         | 29.2               |
| 6/1 to 6/15       | 159                            | 3.8                | 106                            | 6.6                | 48                          | 12.5               | 75                          | 23.0               |
| 6/16 to 6/30      | 156                            | 5.1                | 100                            | 5.0                | 57                          | 15.8               | 128                         | 18.8               |
| 7/1 to 7/15       | 213                            | 4.7                | 119                            | 5.9                | 82                          | 8.5                | 147                         | 15.6               |
| 7/16 to 7/31      | 144                            | 6.9                | 129                            | 5.4                | 57                          | 12.3               | 133                         | 19.5               |
| 8/1 to 8/15       | 140                            | 2.1                | 95                             | 2.1                | 31                          | 9.7                | 78                          | 20.5               |
| 8/16 to 8/31      | 130                            | 4.6                | 104                            | 7.7                | 65                          | 16.9               | 125                         | 20.0               |
| 9/1 to 9/15       | 87                             | 4.6                | 83                             | 8.4                | 42                          | 11.9               | 80                          | 21.3               |
| 9/16 to 9/30      | 110                            | 3.6                | 84                             | 7.1                | 46                          | 23.9               | 55                          | 29.1               |
| 10/1 to 10/15     | 106                            | 3.8                | 78                             | 10.3               | 30                          | 6.7                | 75                          | 22.7               |
| 10/16 to 10/31    | 212                            | 5.7                | 125                            | 8.1                | 82                          | 17.1               | 102                         | 22.8               |
| 11/1 to 11/15     | 123                            | 8.1                | 112                            | 6.3                | 40                          | 15.0               | 76                          | 15.8               |

Notes: No.= Number of. COVID-19 was identified via reverse transcriptase polymerase chain reaction testing for SARS-CoV-2. The CFS (Cognitive Function Scale) score ranges from 1 to 4; scores of 3 and 4 indicate moderate and severe cognitive impairment, respectively. The Activities of Daily Living (ADL) score signifies the extent to which residents are dependent on 7 activities of daily living, denoted by a higher score. An ADL score of 19 represents the 75th percentile value of the analytic sample, and reflects a substantial level of functional impairment.

**VII. Appendix Exhibit A5. Multivariable Association between COVID-19 Diagnosis Date and 30-day Mortality**

| Covariate               | Full Sample<br>RR (95% CI) | Symptomatic<br>RR (95% CI) | Asymptomatic<br>RR (95% CI) |
|-------------------------|----------------------------|----------------------------|-----------------------------|
| 3/16 to 3/31            | 0.92 (0.73 1.16)           | 1.01 (0.82 1.24)           | 0.49 (0.21 1.15)            |
| 4/1 to 4/15             | Referent                   | Referent                   | Referent                    |
| 4/16 to 4/30            | 0.79 (0.68 0.93)           | 0.84 (0.73 0.96)           | 0.67 (0.49 0.92)            |
| 5/1 to 5/15             | 0.74 (0.57 0.97)           | 0.77 (0.65 0.93)           | 0.65 (0.39 1.09)            |
| 5/16 to 5/31            | 0.64 (0.47 0.86)           | 0.72 (0.56 0.94)           | 0.49 (0.29 0.82)            |
| 6/1 to 6/15             | 0.49 (0.30 0.79)           | 0.53 (0.30 0.91)           | 0.41 (0.20 0.86)            |
| 6/16 to 6/30            | 0.52 (0.36 0.76)           | 0.60 (0.43 0.84)           | 0.42 (0.19 0.93)            |
| 7/1 to 7/15             | 0.49 (0.37 0.65)           | 0.62 (0.47 0.82)           | 0.38 (0.24 0.59)            |
| 7/16 to 7/31            | 0.56 (0.37 0.87)           | 0.58 (0.36 0.94)           | 0.50 (0.27 0.92)            |
| 8/1 to 8/15             | 0.35 (0.26 0.47)           | 0.27 (0.18 0.41)           | 0.42 (0.23 0.75)            |
| 8/16 to 8/31            | 0.51 (0.35 0.75)           | 0.50 (0.35 0.72)           | 0.46 (0.26 0.82)            |
| 9/1 to 9/15             | 0.54 (0.35 0.84)           | 0.57 (0.35 0.93)           | 0.48 (0.26 0.91)            |
| 9/16 to 9/31            | 0.64 (0.43 0.95)           | 0.68 (0.47 0.99)           | 0.53 (0.32 0.89)            |
| 10/1 to 10/15           | 0.55 (0.30 0.98)           | 0.47 (0.22 1.01)           | 0.51 (0.27 0.96)            |
| 10/16 to 10/31          | 0.67 (0.47 0.94)           | 0.50 (0.32 0.79)           | 0.68 (0.44 1.04)            |
| 11/1 to 11/15           | 0.53 (0.36 0.80)           | 0.34 (0.19 0.62)           | 0.62 (0.39 0.98)            |
| Age <65                 | 0.34 (0.26 0.45)           | 0.32 (0.23 0.44)           | 0.38 (0.24 0.59)            |
| Age, 65 to 69           | 0.69 (0.55 0.86)           | 0.64 (0.50 0.82)           | 0.77 (0.49 1.19)            |
| Age, 70 to 74           | 0.80 (0.66 0.98)           | 0.80 (0.64 1.01)           | 0.77 (0.55 1.09)            |
| Age, 75 to 79           | Referent                   | Referent                   | Referent                    |
| Age, 80 to 84           | 1.25 (1.08 1.45)           | 1.27 (1.08 1.51)           | 1.15 (0.87 1.53)            |
| Age, 85 to 89           | 1.36 (1.17 1.57)           | 1.32 (1.12 1.56)           | 1.41 (1.08 1.84)            |
| Age, ≥90                | 1.74 (1.51 2.02)           | 1.61 (1.38 1.87)           | 1.96 (1.49 2.57)            |
| Female sex              | 0.71 (0.66 0.77)           | 0.77 (0.70 0.85)           | 0.61 (0.53 0.71)            |
| Race, White             | Referent                   | Referent                   | Referent                    |
| Race, Black             | 0.78 (0.67 0.91)           | 0.80 (0.69 0.93)           | 0.78 (0.62 0.99)            |
| Race, Other             | 0.75 (0.61 0.91)           | 0.74 (0.60 0.91)           | 0.77 (0.58 1.02)            |
| CFS score, 1            | Referent                   | Referent                   | Referent                    |
| CFS score, 2            | 1.09 (0.95 1.25)           | 1.05 (0.89 1.25)           | 1.13 (0.91 1.41)            |
| CFS score, 3            | 1.62 (1.41 1.86)           | 1.57 (1.34 1.84)           | 1.67 (1.32 2.10)            |
| CFS score, 4            | 1.95 (1.67 2.28)           | 1.84 (1.53 2.21)           | 2.02 (1.51 2.70)            |
| ADL score, 0 to 13      | Referent                   | Referent                   | Referent                    |
| ADL score, 14 to 18     | 1.08 (0.94 1.24)           | 1.00 (0.84 1.18)           | 1.30 (0.98 1.72)            |
| ADL score, 19 to 20     | 1.32 (1.17 1.50)           | 1.36 (1.17 1.56)           | 1.35 (1.04 1.74)            |
| ADL score, 21 to 28     | 1.61 (1.39 1.87)           | 1.45 (1.24 1.71)           | 1.97 (1.48 2.62)            |
| Post-Acute patient      | 0.87 (0.75 1.00)           | 0.77 (0.64 0.91)           | 1.05 (0.82 1.33)            |
| Dementia                | 1.24 (1.10 1.40)           | 1.18 (1.05 1.33)           | 1.36 (1.08 1.69)            |
| Heart failure           | 1.14 (1.03 1.26)           | 0.97 (0.85 1.11)           | 1.48 (1.27 1.72)            |
| Coronary artery disease | 1.05 (0.96 1.15)           | 1.00 (0.89 1.13)           | 1.11 (0.95 1.31)            |
| COPD/Asthma*            | 1.07 (0.98 1.18)           | 1.02 (0.91 1.15)           | 1.16 (1.01 1.34)            |
| Chronic kidney disease† | 1.16 (1.05 1.29)           | 1.21 (1.07 1.37)           | 1.05 (0.88 1.26)            |
| Hypertension            | 0.92 (0.82 1.02)           | 0.87 (0.78 0.97)           | 1.00 (0.82 1.20)            |
| Diabetes                | 1.13 (1.05 1.22)           | 1.13 (1.03 1.25)           | 1.11 (0.96 1.28)            |
| Fever                   | 1.36 (1.22 1.53)           | 1.37 (1.23 1.53)           | -- --                       |
| Tachycardia             | 1.26 (1.05 1.52)           | 1.37 (1.14 1.65)           | -- --                       |
| Hypoxia                 | 1.62 (1.43 1.82)           | 1.57 (1.39 1.77)           | -- --                       |
| Shortness of breath     | 1.75 (1.54 1.99)           | 1.78 (1.56 2.02)           | -- --                       |
| Any COVID-19 symptom‡   | 1.22 (1.04 1.43)           | -- --                      | -- --                       |



Notes: Point estimates were obtained from robust Poisson regression (see methods for details). CFS=Cognitive function scale, ADL=Activities of daily living.

\*Includes asthma, chronic obstructive pulmonary disease, chronic bronchitis, and restrictive lung diseases.

†Includes renal insufficiency, renal disease, or end-stage renal disease.

‡Residents were classified as symptomatic if any of the following symptoms were present during the five days prior to their first positive test or during the 14 days afterwards: cough, sore throat, nasal congestion, rhinorrhea, fever, shortness of breath, chest congestion, nausea, vomiting, diarrhea, anosmia, malaise, confusion, tachycardia, and hypoxia.

**VIII. Appendix Exhibit A6. Multivariable Association between COVID-19 Diagnosis Date and 30-day Mortality Estimated with Fixed Effects Linear Probability Model**

| Covariate                           | Full Sample<br>$\beta$ (95% CI) | Symptomatic<br>$\beta$ (95% CI) | Asymptomatic<br>$\beta$ (95% CI) |
|-------------------------------------|---------------------------------|---------------------------------|----------------------------------|
| 3/16 to 3/31                        | 2.2 (-4.9, 9.2)                 | 2.8 (-4.4, 9.9)                 | -5.8 (-15.8, 4.2)                |
| 4/1 to 4/15                         | Referent                        | Referent                        | Referent                         |
| 4/16 to 4/30                        | -6.5 (-10.2, -2.9)              | -5.7 (-9.5, -1.9)               | -8.3 (-14.5, -2.0)               |
| 5/1 to 5/15                         | -7.4 (-12.7, -2.0)              | -6.2 (-11.2, -1.1)              | -7.9 (-15.5, -0.3)               |
| 5/16 to 5/31                        | -8.7 (-14.1, -3.3)              | -8.8 (-16.3, -1.2)              | -9.6 (-16.5, -2.8)               |
| 6/1 to 6/15                         | -11.8 (-17.1, -6.6)             | -15.8 (-23.6, -8.0)             | -10.6 (-17.8, -3.5)              |
| 6/16 to 6/30                        | -10.6 (-15.6, -5.6)             | -11.3 (-18.7, -4.0)             | -9.7 (-16.3, -3.1)               |
| 7/1 to 7/15                         | -9.3 (-14.0, -4.6)              | -7.4 (-14.8, 0.1)               | -9.1 (-15.6, -2.6)               |
| 7/16 to 7/31                        | -10.4 (-15.6, -5.1)             | -11.3 (-19.5, -3.0)             | -9.8 (-16.8, -2.8)               |
| 8/1 to 8/15                         | -10.4 (-15.4, -5.3)             | -18.9 (-27.5, -10.4)            | -7.3 (-14.2, -0.4)               |
| 8/16 to 8/31                        | -9.9 (-15.0, -4.7)              | -13.8 (-22.6, -5.0)             | -9.4 (-16.3, -2.5)               |
| 9/1 to 9/15                         | -8.4 (-15.6, -1.1)              | -10.3 (-23.4, 2.8)              | -8.1 (-16.6, 0.4)                |
| 9/16 to 9/31                        | -7.9 (-14.1, -1.8)              | -8.1 (-17.2, 0.9)               | -9.8 (-17.5, -2.1)               |
| 10/1 to 10/15                       | -8.5 (-15.0, -2.0)              | -13.0 (-24.9, -1.1)             | -9.2 (-17.1, -1.2)               |
| 10/16 to 10/31                      | -7.1 (-12.5, -1.6)              | -11.9 (-18.4, -5.4)             | -7.2 (-15.0, 0.6)                |
| 11/1 to 11/15                       | -9.5 (-15.1, -3.9)              | -19.4 (-30.8, -8.0)             | -8.5 (-15.8, -1.1)               |
| Age <65                             | -7.2 (-9.7, -4.8)               | -11.1 (-14.5, -7.7)             | -4.6 (-7.3, -2.0)                |
| Age, 65 to 69                       | -4.0 (-6.3, -1.6)               | -6.0 (-9.9, -2.2)               | -2.6 (-5.6, 0.4)                 |
| Age, 70 to 74                       | -2.6 (-5.0, -0.2)               | -3.3 (-7.1, 0.4)                | -2.7 (-5.7, 0.2)                 |
| Age, 75 to 79                       | Referent                        | Referent                        | Referent                         |
| Age, 80 to 84                       | 3.3 (1.0, 5.5)                  | 5.5 (1.4, 9.6)                  | 0.3 (-2.3, 2.9)                  |
| Age, 85 to 89                       | 4.5 (2.1, 6.8)                  | 5.6 (1.6, 9.5)                  | 2.6 (-0.2, 5.4)                  |
| Age, $\geq 90$                      | 9.9 (7.5, 12.3)                 | 11.5 (7.8, 15.3)                | 7.7 (4.5, 11.0)                  |
| Female sex                          | -5.3 (-6.7, -3.9)               | -5.2 (-7.4, -3.0)               | -4.9 (-6.5, -3.3)                |
| Race, White                         | Referent                        | Referent                        | Referent                         |
| Race, Black                         | -1.3 (-3.0, 0.5)                | -2.8 (-5.7, 0.1)                | 0.6 (-1.3, 2.6)                  |
| Race, Other                         | -2.7 (-5.3, -0.2)               | -5.4 (-9.8, -0.9)               | -0.8 (-3.4, 1.8)                 |
| CFS score, 1                        | Referent                        | Referent                        | Referent                         |
| CFS score, 2                        | -0.2 (-1.7, 1.3)                | -0.1 (-2.8, 2.7)                | -0.1 (-1.7, 1.5)                 |
| CFS score, 3                        | 5.8 (3.9, 7.7)                  | 7.9 (4.7, 11.1)                 | 3.7 (1.5, 5.8)                   |
| CFS score, 4                        | 10.8 (8.0, 13.5)                | 13.3 (8.7, 17.9)                | 8.2 (4.8, 11.5)                  |
| ADL score, 0 to 13                  | Referent                        | Referent                        | Referent                         |
| ADL score, 14 to 18                 | 1.1 (-0.3, 2.5)                 | 0.6 (-1.9, 3.1)                 | 2.2 (0.3, 4.1)                   |
| ADL score, 19 to 20                 | 4.3 (2.6, 6.0)                  | 7.1 (4.3, 10.0)                 | 2.3 (0.4, 4.2)                   |
| ADL score, 21 to 28                 | 8.1 (6.1, 10.1)                 | 8.8 (5.7, 11.9)                 | 7.8 (5.3, 10.3)                  |
| Post-Acute patient                  | -1.9 (-4.0, 0.1)                | -4.3 (-7.5, -1.2)               | 0.4 (-2.1, 2.9)                  |
| Dementia                            | 2.9 (1.3, 4.6)                  | 3.2 (0.7, 5.8)                  | 2.6 (0.5, 4.8)                   |
| Heart failure                       | 2.0 (0.2, 3.8)                  | -0.1 (-3.0, 2.9)                | 4.4 (2.5, 6.3)                   |
| Coronary artery disease             | 0.5 (-1.1, 2.0)                 | 0.1 (-2.5, 2.6)                 | 0.9 (-1.1, 3.0)                  |
| COPD/Asthma*                        | 1.0 (-0.4, 2.5)                 | 0.2 (-2.2, 2.7)                 | 1.9 (0.3, 3.4)                   |
| Chronic kidney disease <sup>†</sup> | 2.7 (0.9, 4.5)                  | 4.4 (1.4, 7.3)                  | 0.7 (-1.2, 2.6)                  |
| Hypertension                        | -1.6 (-3.2, -0.0)               | -2.6 (-5.0, -0.2)               | -0.4 (-2.2, 1.3)                 |
| Diabetes                            | 1.7 (0.5, 2.9)                  | 2.4 (0.3, 4.5)                  | 1.4 (-0.1, 2.8)                  |
| Fever                               | 5.2 (2.9, 7.6)                  | 5.2 (2.6, 7.7)                  | -- --                            |
| Tachycardia                         | 4.0 (0.1, 8.0)                  | 7.0 (2.2, 11.7)                 | -- --                            |
| Hypoxia                             | 12.5 (8.8, 16.3)                | 11.6 (7.7, 15.5)                | -- --                            |
| Shortness of breath                 | 16.6 (12.3, 20.9)               | 16.3 (12.0, 20.7)               | -- --                            |
| Any COVID-19 symptom <sup>‡</sup>   | 0.9 (-1.0, 2.8)                 | -- --                           | -- --                            |

Notes: Point estimates were obtained from a linear probability model with nursing home fixed effects. CFS=Cognitive function scale, ADL=Activities of daily living.

\*Includes asthma, chronic obstructive pulmonary disease, chronic bronchitis, and restrictive lung diseases.

†Includes renal insufficiency, renal disease, or end-stage renal disease.

‡Residents were classified as symptomatic if any of the following symptoms were present during the five days prior to their first positive test or during the 14 days afterwards: cough, sore throat, nasal congestion, rhinorrhea, fever, shortness of breath, chest congestion, nausea, vomiting, diarrhea, anosmia, malaise, confusion, tachycardia, and hypoxia.

**IX. Appendix Exhibit A7. Correspondence between Crude Community and Nursing Home Level COVID-19 Case Fatality Rates**

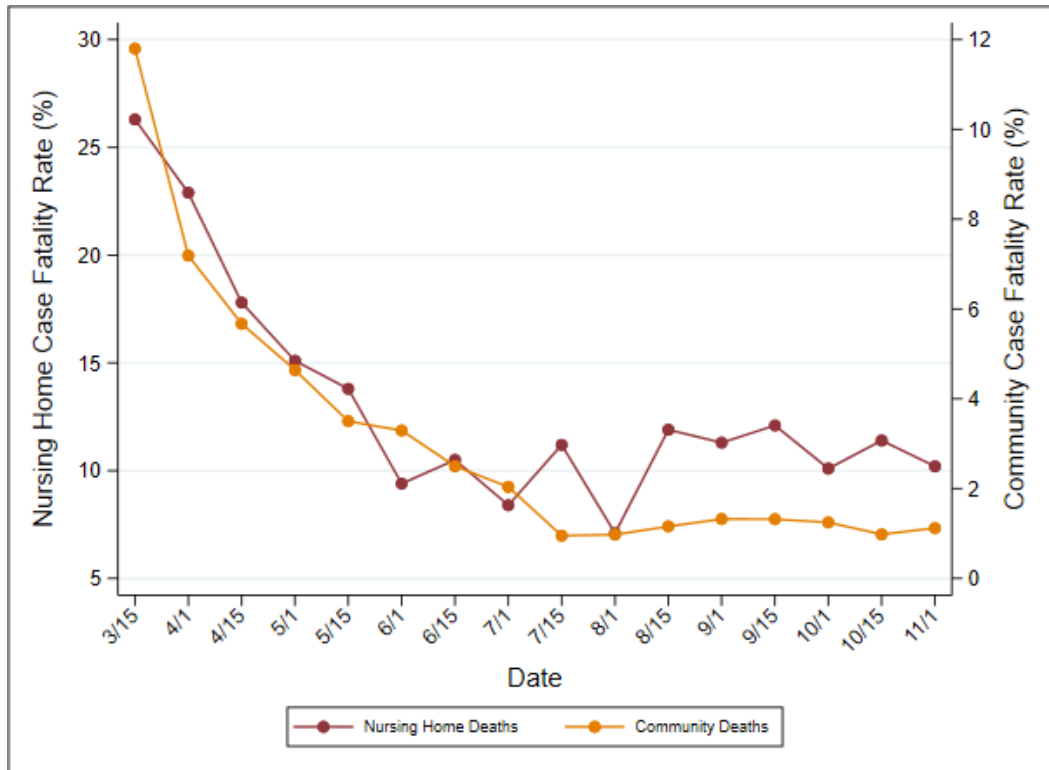

Notes: The calculation of community level case fatality rates are described in Section II of this appendix.

**X. Appendix Exhibit A8. Adjusted Trends in 30-Day Hospitalization Rates among Residents with COVID-19**

| Date of Diagnosis | Full Sample                        |          | Symptomatic Residents              |          | Asymptomatic Residents             |          |
|-------------------|------------------------------------|----------|------------------------------------|----------|------------------------------------|----------|
|                   | Adj. Hospitalization Rate (95% CI) | <i>p</i> | Adj. Hospitalization Rate (95% CI) | <i>p</i> | Adj. Hospitalization Rate (95% CI) | <i>p</i> |
| 3/16 to 3/31      | 21.2 (16.2, 26.2)                  | 0.25     | 24.9 (18.2, 31.6)                  | 0.46     | 23.9 (14.2, 33.7)                  | 0.17     |
| 4/1 to 4/15       | 18.0 (14.8, 21.2)                  | Ref.     | 22.3 (19.0, 25.6)                  | Ref.     | 16.4 (10.5, 22.3)                  | Ref.     |
| 4/16 to 4/30      | 16.8 (14.4, 19.1)                  | 0.48     | 21.2 (18.2, 24.2)                  | 0.60     | 13.4 (10.8, 16.0)                  | 0.32     |
| 5/1 to 5/15       | 13.8 (11.6, 16.1)                  | 0.05     | 22.5 (19.1, 25.9)                  | 0.93     | 7.4 (5.6, 9.1)                     | <0.01    |
| 5/16 to 5/31      | 12.6 (8.8, 16.3)                   | 0.028    | 21.0 (14.4, 27.6)                  | 0.73     | 6.1 (3.4, 8.8)                     | 0.001    |
| 6/1 to 6/15       | 16.3 (11.3, 21.2)                  | 0.57     | 23.5 (14.6, 32.3)                  | 0.81     | 10.4 (6.6, 14.3)                   | 0.10     |
| 6/16 to 6/30      | 17.6 (12.7, 22.5)                  | 0.89     | 22.0 (14.2, 29.9)                  | 0.96     | 13.8 (8.5, 19.0)                   | 0.47     |
| 7/1 to 7/15       | 13.9 (10.3, 17.4)                  | 0.09     | 15.8 (10.1, 21.5)                  | 0.06     | 10.8 (7.4, 14.3)                   | 0.09     |
| 7/16 to 7/31      | 16.2 (11.6, 20.8)                  | 0.54     | 24.9 (17.3, 32.5)                  | 0.53     | 9.4 (5.3, 13.5)                    | 0.047    |
| 8/1 to 8/15       | 11.1 (7.7, 14.4)                   | 0.004    | 15.7 (10.1, 21.2)                  | 0.05     | 7.8 (3.5, 12.1)                    | 0.017    |
| 8/16 to 8/31      | 19.2 (14.2, 24.1)                  | 0.70     | 25.3 (18.5, 32.1)                  | 0.43     | 14.0 (8.6, 19.3)                   | 0.55     |
| 9/1 to 9/15       | 19.9 (15.3, 24.4)                  | 0.53     | 30.2 (22.1, 38.2)                  | 0.08     | 12.2 (7.9, 16.5)                   | 0.27     |
| 9/16 to 9/30      | 23.1 (17.5, 28.7)                  | 0.11     | 30.5 (24.8, 36.3)                  | 0.01     | 17.1 (10.7, 23.5)                  | 0.85     |
| 10/1 to 10/15     | 19.3 (14.4, 24.2)                  | 0.68     | 25.0 (14.7, 35.4)                  | 0.62     | 14.3 (10.1, 18.5)                  | 0.59     |
| 10/16 to 10/31    | 16.2 (11.5, 20.9)                  | 0.54     | 25.7 (14.9, 36.4)                  | 0.56     | 9.9 (5.9, 13.8)                    | 0.06     |
| 11/1 to 11/15     | 16.6 (12.9, 20.4)                  | 0.59     | 23.5 (16.9, 30.1)                  | 0.74     | 11.3 (7.7, 14.9)                   | 0.14     |

Notes: Adjusted hospitalization rates were derived from a robust Poisson regression model. Covariates were age, sex, race (categorized as White, Black, and Other), activities of daily living score, Cognitive Function Scale score, baseline comorbidities, post-acute vs. long-stay status, and presence of COVID-19 related symptoms (see methods for details). The *p* values indicate whether the adjusted hospitalization rate for a given period significantly differs from that of the reference period (4/1 to 4/15).
